# Supplementary material for: A bibliometric analysis of studies on environmental enrichment spanning 1967–2024: patterns and trends over the years
Source: Front Behav Neurosci. 2024 Dec 4;18:1501377. doi: 10.3389/fnbeh.2024.1501377 (PMC11652173; doi:10.3389/fnbeh.2024.1501377)
Supplement: Supplementary file 1 [file Table_1.XLSX]

## Sheet: Appendix1 Top KW yearwise
Year	Keywords
1967	environmental enrichment, deprivation, cognitive functioning, institutionalization
1968	environmental enrichment, adaptive behavior, institutional, deprivation
1970	environmental enrichment, open field, food competition behavior, rodents, running wheel
1972	rodents, open field, environmental enrichment, hebbwilliams maze test errors, defecation, sex, postweaning enrichment vs restriction experience, exploration, running wheels behavior, strain
1973	defecation, exploration, rodents, rearing in enriched vs standard environment, openfield activity, running wheel activity
1975	environmental impoverishment, exploration, open field, cage size, defecation, running wheel activity, surface texture as environmental enrichment factors, body weight, water intake, rodents, learning, memory
1976	aggression, environmental crowding, hormonal effects, reproduction
1977	brief environmental enrichment following postweaning cerebral lesions, methamphetamine, recovery of learning, rodents
1978	environmental enrichment, activity, arousal, chlorpromazine, strychnine
1981	environmental enrichment, benzodiazepine recpetor, hebbwilliams maze, microcephaly, prenatal xirradiation
1982	environmental enrichment, environmental restriction, exploratory behavior, maze learning, reactivity, septal lesions
1983	rodents, active sleep, clonidine, differential environment, cortical development, infant rat
1985	maze learning, prenatal environmental enrichment
1986	environmental enrichment, 6hydroxydopamine, acetylcholine, acetylcholinesterase, cortex, fimbriafornix, hippocampus, neural transplant, noradrenaline depletion, nucleus basalis magnocellularis, septum
1987	environmental enrichment, compensation, contralateral neglect, rodents, impoverished environment, recovery, attention, locomotor activity
1988	environmental enrichment, rodents, compensation, discrimination reversal, enriched/impoverished environment, hebbwilliams maze, postweaning, preweaning, recovery, macaca mulatta
1989	environmental enrichment, basal dendrite, golgi method, occipital cortex, preweaning, pyramidal neuron, rodents, dominance subordination, ethanol, intake, macaca mulatta, males
1990	environmental enrichment, abnormal behaviour, cortisol, laboratory primates, serotonin, single cageing, stress, exploration, macaca mulatta, object enrichment, restricted daily exposure
1991	environmental enrichment, cage furnishings, feeding, foraging, husbandry procedures, object manipulation, stereotypic behavior, macaca mulatta, neonatal behavior, rhesus monkey, food puzzle, nonhuman primate
1992	environmental enrichment, associative learning, autoimmunity, exploration, rodents, restricted daily exposure, spatial learning, uncontrollable stress, ethanol, intake
1993	environmental enrichment, housing, learning, recovery of function, water maze, rodent, dopamine, dopac, amphetamine, locomotor activity, nucleus accumbens, striatum, bilateral cortical damage, brain injury, compensation, cortex, occipital lesions, activity pattern, ataxia, chicken, cortical depth, dog, fearful behavior, fetal alcohol syndrome, gait, handling, morris maze, prenatal ethanol, psycho…
1994	environmental enrichment, rodents, adrenal, aggression, anxiety, corticosterone, defense behaviors, docosahexaenoic acid, dominance, early inconsistent stimulation, essential fatty acid, in situ hybridization, learning, mineralocorticoid receptor, morris maze, n-3 fatty acid, nerve growth factor, open-field, postnatal handling, predator stress, sex differences, shuttlebox learning, social organiz…
1995	environmental enrichment, behavior, breeding colony, early experience, macaca mulatta, maternal behavior, maternal competence, primiparous females, social restriction, amphetamine, dihydroxyphenylacetic acid, dopamine, nucleus accumbens, striatum, animal welfare, acoustic enrichment
1996	environmental enrichment, rodents, agression, autoimmunity, cortex, cortical development, dyslexia, ectopia, exercise, hebbwilliams maze, housing density, immunocompetence, lashley maze, morris maze, neuronal migration, pcr, reference memory, spatial learning, test experience, psychological well-being, testosterone
1997	environmental enrichment, nesting material, behavior, rodents, age-related deficit, anxiety, hippocampus, neonatal handling, novelty reward seeking, reactivity to stress, roman high and low avoidance rats, preference test, spatial learning, physiological parameters, group housing, inanimate enrichment, rhesus macaque, social enrichment, welfare
1998	environmental enrichment, rodents, welfare, behavior, hippocampus, feeding and nutrition, motivation, ontogeny, stereotypies, wire gnawing, learning, ngf mrna, perceptual integration, plasticity, visual cortex, 5-ht1a receptor, activity patterns, apes, chimpanzees, cortical plasticity, cytokines, glutamate receptors, histogenetic gradient, in situ hybridization, lymphocytes, macaca mulatta, natur…
1999	environmental enrichment, welfare, rodents, behavior, dogs, guineapigs, primates, rabbits, regulatory toxicology, aging, astrocytes, gfap, plasticity, time discrimination, working memory, aggression, cage side preferences, cortisol, domestic chicks, dominance, glucocorticoid receptors, guineapigs, isolation, ngf, open-field behaviour, pecking, pigs, postnatal handling, primates, psychological wel…
2000	environmental enrichment, pigs, welfare, neurotrophins, behavior, acuity, aggression, circadian rhythm, cortisol, dominance, elisa, locomotion, memory, novelty, plasticity, prepulse inhibition, schizophrenia, spatial learning, vision, water maze, contextual conditioning, contextual discrimination, housing, learning, physiology, preferences, rabbit, spatial learning, stress response
2001	environmental enrichment, welfare, alzheimer's disease, calories, mitochondria, neurotrophic factor, oxidative stress, parkinsons disease, stroke, amphetamine, drug reward, isolation rearing, sex difference, social environment, behavior, creb, corticosterone, defensive behaviors, dendrite, ectopia, emotional reactivity, hebb-williams maze, hippocampus, ischemic tolerance, memory, neuroplasticity,…
2002	environmental enrichment, rodents, behavior, stress, corticosterone, neural plasticity, anxiety, learning, hippocampus, memory, cognition, exploration, early experience, novelty, traumatic brain injury, welfare, addiction, age-related deficits, brain, cell-mediated immune responses, cytochrome oxidase, dendritic spines, differential rearing, down syndrome, fear, gender, haematological analysis, i…
2003	environmental enrichment, stress, welfare, corticosterone, rodents, hippocampus, adrenal tyrosine hydroxylase, acth, adrenocortical system, adrenomedullary system, aggression, immune system, immunoglobulins, play, alzheimer's disease, amyloid, bdnf, behaviour, brain, cognition, conditioned place preference, cortical plasticity, dendrite, elisa, enriched/impoverished environment, exercise, glutama…
2004	environmental enrichment, rodents, welfare, fibroblast growth factor, bdnf, brdu, central nervous system, cns, cornu amonis 1, cornu amonis 3, hippocampus, enriched condition, fibroblast growth factor, gaba, gdnf, corticosterone, aggression, plasticity, dopamine transporter, maternal care, medial prefrontal cortex, preference, synaptic plasticity, adrenocortical system, adrenomedullary system, al…
2005	environmental enrichment, rodents, female preference hypothesis, dentate gyrus, dopamine transporter, exercise, neurogenesis, rabbits, traumatic brain injury, alzheimer's disease, amyloid precursor protein, welfare, anxiety, astrogenesis, auditory stimulation, bdnf, brdu, behavior, cognitive, behavior, dendritic spines, elevated plus maze, epigenetic, fear, female preference hypothesis, gdnf, gen…
2006	environmental enrichment, pigs, rodents, welfare, behavior, hippocampus, acute stress, amphetamine, chronic stress, constant light, gestation, housing systems, isolation, maternal care, sex differences, toys, dentate gyrus, neurogenesis, stereotypic behavior, anticipatory behavior, appetitive conditioning, autism, behavioural stress, captivity, chronic stress, conditioned freezing, context, corpu…
2007	environmental enrichment, rodents, welfare, pigs, anxiety, corticoids, estradiol, memory, neurogenesis, object memory, prefrontal cortex, recovery, spatial memory, 5-ht, 6-hydroxydopamine, abnormal behaviour, acetylcholine, acoustic trauma, acute stress, affective state, afterhyperpolarization, aged, alzheimer's disease, amphetamine, amyloid burden, animal well-being, apolipoprotein e4, apoptosis…
2008	environmental enrichment, rodents, stress, dopamine, 192 igg-saporin, amphetamine, behavior, drug abuse, focal ischemia, learning and memory, neurogenesis, neurotrophin-3, prefrontal cortex, striatum, sucrose, welfare, 16s rrna gene, 5-ht, als, acetylcholine, addiction, aging, allodynia, alzheimer's disease, amygdala, angiogenesis, welfare, antinociception, antipsychotics, anxiety-related behavio…
2009	environmental enrichment, rodents, hippocampus, alzheimer's disease, welfare, learning, neurogenesis, behavior, conditioned place preference, dendritic spines, dopamine, nucleus accumbens, stress, addiction, aging, astrocyte, cocaine, memory, morris water maze, novelty, pigs, rett syndrome, stem cell, 192 igg-saporin, acetylcholine, amygdala, amyotrophic lateral sclerosis, animal wellbeing, apica…
2010	environmental enrichment, rodents, bdnf, welfare, spatial memory, anxiety, alzheimer's disease, anxiety, behavior, bdnf, cortisol, dopamine, drug abuse, exercise, habituation, morris water maze, nucleus accumbens, pigs, rett syndrome, antidepressant effect,controlled cortical impact, depression, forced swim test, recovery, 5-ht1a receptor agonist, abnormal behaviour, activity levels, addiction, a…
2011	environmental enrichment, rodents, welfare, hippocampus, neurogenesis, stress, alzheimer's disease, anxiety, stereotypic behaviour, aggression, behavior, down syndrome, morris water maze, neuroprotection, cocaine, corticosterone, depression, elevated plus maze, emotion, exercise, functional recovery, neural regeneration, piglets, plasticity, prenatal stress, social behaviour, social housing, ster…
2012	environmental enrichment, rodents, welfare, hippocampus, synaptic plasticity, behavior, stress, aging, activity, aggression, alzheimer's disease, anxiety, astrocytes, bdnf, cytokines, exercise, hpa axis, housing, learning, memory, microglia, morris water maze, neurogenesis, neurotrophins, pigs, plasticity, spatial learning, stereotypy, withdrawal, controlled cortical impact, functional recovery, …
2013	environmental enrichment, rodents, anxiety, behavior, hippocampus, learning, traumatic brain injury, welfare, aging, corticosterone, dopamine, memory, acetylcholine, adult, adult neurogenesis, alzheimer's disease, animal model, autism, chronic stress, controlled cortical impact, elevated plus maze, habituation, inhibitory avoidance, isolation, moderate to severe, morris water maze, neurogenesis, …
2014	environmental enrichment, rodents, hippocampus, anxiety, aging, bdnf, behavior, glucocorticoid receptor, traumatic brain injury, alzheimer's disease, welfare, cerebral cortex, cytokines, depression, feather pecking, hippocampal slice culture, learning, memory, neurogenesis, neurons, neuroplasticity, nucleus accumbens, prefrontal cortex, prenatal stress, sparus aurata, spatial memory, substrate, 5…
2015	environmental enrichment, rodents, hippocampus, anxiety, aging, behavior, corticosterone, glutamate, memory, psittacine, alzheimer's disease, welfare, bdnf, depression, gaba, habituation, morris water maze, neurogenesis, object recognition, physical activity, prefrontal cortex, principal component analysis, synaptic plasticity, wellness, prenatal stress, (-)-epigallocatechin-3-gallate, 129sv, act…
2016	environmental enrichment, rodents, aging, anxiety, welfare, hippocampus, neurogenesis, oxidative stress, behavior, memory, stress, cognition, corticosterone, epigenetics, inflammation, morris water maze, nicotine, prefrontal cortex, adolescence, adult neurogenesis, bdnf, behavioural flexibility, cocaine, cognitive function, conditioned place preference, craving, deer mice, down syndrome, drug abu…
2017	environmental enrichment, rodents, hippocampus, anxiety, morris water maze, welfare, animal welfare, stress, depression, memory, neurogenesis, functional recovery, learning and memory, traumatic brain injury, behavior, cognition, spatial memory, behavioral outcome, controlled cortical impact, alzheimer's disease, bdnf, broiler, captive animals, conditioned place preference, environment enrichment…
2018	environmental enrichment, rodents, anxiety, stress, corticosterone, alzheimer's disease, bdnf, hippocampus, memory, neuroplasticity, oxidative stress, addiction, adolescence, aging, animal model, welfare, behavior, cortisol, environmental stimulation, exercise, inflammation, learning, morris water maze, neurodevelopment, neuroprotection, pigs, relapse, schizophrenia, self-administration, spatial …
2019	environmental enrichment, rodents, anxiety, cognition, behavior, hippocampus, morris water maze, welfare, learning and memory, aerobic exercise, aging, depression, neurogenesis, pigs, spatial memory, structural complexity, addiction, bdnf, controlled cortical impact, corticosterone, exercise, functional recovery, gene, gestation, igf-1, memory, mental illness, physical activity, pig assessment, p…
2020	environmental enrichment, rodents, welfare, stress, bdnf, behavior, addiction, aggression, anxiety, chronic cerebral hypoperfusion, corticosterone, hippocampus, relapse, spatial memory, vascular dementia, aerobic exercise, amygdala, animal behavior, autism spectrum disorder, cognitive impairment, ethanol, memory, neuroplasticity, oxidative stress, pten, reinstatement, sociability, swine, laying h…
2021	environmental enrichment, rodents, stress, welfare, behavior, aging, memory, bdnf, epigenetics, hippocampus, synaptic plasticity, amygdala, anxiety, autism, cocaine, depression, epilepsy, ethology, functional recovery, gene expression, glucocorticoid receptor, hpa axis, impulsivity, learning, neurogenesis, nucleus accumbens, schizophrenia, sex difference, zebrafish, cognition, husbandry, neuropla…
2022	environmental enrichment, rodents, welfare, hippocampus, bdnf, behavior, cognition, conditioning, adolescence, inflammation, neurogenesis, oxidative stress, feather pecking, learning and memory, social isolation, aging, alzheimer's disease, amygdala, anxiety, autism spectrum disorders, cognitive impairment, corticosterone, depression, development, early life stress, isolation, maternal separation…
2023	environmental enrichment, rodents, welfare, behavior, stress, hippocampus, anxiety, memory, depression, synaptic plasticity, neurogenesis, swine, adult hippocampal neurogenesis, aging, apoptosis, cognition, corticosterone, essential oils, locomotion, music therapy, neophobia, neuroprotection, plasticity, quality of life, stroke, adhd, amd adult psychiatry,affiliative behavior, alzheimer’s disease…
2024	environmental enrichment, rodents, behavior, welfare, anxiety, bdnf, cognition, corticosterone, environmental complexity, fish welfare, neuroinflammation, neuroprotection, oxytocin, physical activity, recovery, social isolation, stress, stroke, hippocampus, neurogenesis, performance, serotonin, 5xfad mice, ampa-gria1, abnormal behaviour, adolescence, affective states, aging, alternative protein, …

## Sheet: Appendix2 Scopus refined values
Number of results : 1847
Query: ((TITLE(environmental) AND TITLE(enrichment)) AND PUBYEAR > 1966 AND PUBYEAR < 2025 AND ( LIMIT-TO ( DOCTYPE,"ch" ) OR LIMIT-TO ( DOCTYPE,"re" ) OR LIMIT-TO ( DOCTYPE,"ar" ) ) AND ( LIMIT-TO ( LANGUAGE,"English" ) ) AND ( LIMIT-TO ( SRCTYPE,"j" ) OR LIMIT-TO ( SRCTYPE,"b" ) OR LIMIT-TO ( SRCTYPE,"k" ) ) AND ( EXCLUDE ( SUBJAREA,"ENVI" ) OR EXCLUDE ( SUBJAREA,"ENGI" ) OR EXCLUDE ( SUBJAREA,…
Retrieved on: August 31, 2024
OPEN ACCESS		YEAR		AUTHOR NAME
All Open Access	850	2024	82	Hannan, A.J.	34
Gold	416	2023	94	Kline, A.E.	31
Hybrid Gold	104	2022	122	Bardo, M.T.	24
Bronze	130	2021	117	Cheng, J.P.	20
Green	475	2020	106	Bondi, C.O.	19
		2019	110	Maffei, L.	19
SOURCE TYPE		2018	88	Baumans, V.	15
Journal	1811	2017	89	Solinas, M.	15
Book	24	2016	112	Berardi, N.	13
Book Series	12	2015	85	Bolhuis, J.E.	13
		2014	74	Jaber, M.	11
DOCUMENT TYPE		2013	69	Kentner, A.C.	11
Article	1692	2012	73	Lewis, M.H.	11
Review	124	2011	89	Sale, A.	11
Book Chapter	31	2010	54	Stairs, D.J.	11
		2009	50	Thiriet, N.	11
LANGUAGE		2008	45	Camarini, R.	10
English	1847	2007	44	Edwards, S.A.	10
		2006	32	Green, T.A.	10
INCLUDED SUBJECT AREA		2005	35	Johnson, A.K.	10
Neuroscience	837	2004	32	Kemp, B.	10
Agricultural and Biological Sciences	601	2003	29	Mason, G.	10
Biochemistry, Genetics and Molecular Biology	411	2002	27	Petrosini, L.	10
Medicine	377	2001	21	Cao, L.	9
Veterinary	354	2000	20	Dierssen, M.	9
Psychology	169	1999	18	Gelfo, F.	9
Pharmacology, Toxicology and Pharmaceutics	151	1998	15	Radabaugh, H.L.	9
Multidisciplinary	86	1997	12	Ranaldi, R.	9
Immunology and Microbiology	57	1996	7	Renoir, T.	9
Health Professions	9	1995	5	Begega, A.	8
		1994	10	Caleo, M.	8
		1993	9	Chauvet, C.	8
		1992	6	Cho, S.R.	8
		1991	6	De Bartolo, P.	8
		1990	4	Dwoskin, L.P.	8
		1989	4	Kempermann, G.	8
		1988	7	Lardeux, V.	8
		1987	5	Mohammed, A.H.	8
		1986	2	Mora, F.	8
		1985	2	Sachser, N.	8
		1984	1	Van De Weerd, H.A.	8
		1983	3	Brenes, J.C.	7
		1982	4	Cenni, M.C.	7
		1981	4	Diniz, D.G.	7
		1980	2	Escorihuela, R.M.	7
		1979	1	Frick, K.M.	7
		1978	2	Grimm, J.W.	7
		1977	2	Miladi-Gorji, H.	7
		1976	1	Netto, C.A.	7
		1975	4	Newberry, R.C.	7
		1973	1	Pizzutto, C.S.	7
		1972	5	Queen, N.J.	7
		1970	2	Sampedro-Piquero, P.	7
		1969	1	Schapiro, S.J.	7
		1968	2	Segovia, G.	7
		1967	1	Van Loo, P.L.P.	7
				Zhu, J.	7
				Ambrée, O.	6
				Beattie, V.E.	6
				Beckmann, J.S.	6
				Bobeck, E.A.	6
				Braschi, C.	6
				Campbell, D.L.M.	6
				Fernández-Teruel, A.	6
				Keyvani, K.	6
				Koolhaas, J.M.	6
				Lee, C.	6
				Manteca, X.	6
				Mench, J.A.	6
				Meyer, M.M.	6
				Monaco, C.M.	6
				O'Connell, N.E.	6
				Palme, R.	6
				Paulus, W.	6
				Rose, F.D.	6
				Van Zutphen, L.F.M.	6
				Würbel, H.	6
				Zhang, Y.	6
				Achaval, M.	5
				Ali, S.	5
				Arias, J.L.	5
				Baroncelli, L.	5
				Baune, B.T.	5
				Bigdeli, I.	5
				Caldara, F.R.	5
				Cassel, J.C.	5
				Corrigan, F.	5
				Crofton, E.J.	5
				Dalla, C.	5
				Del Arco, A.	5
				Díez-León, M.	5
				Folweiler, K.A.	5
				Foti, F.	5
				Galaj, E.	5
				Huang, W.	5
				Jaehne, E.J.	5
				Kelche, C.	5
				Kilgard, M.P.	5
				Lajud, N.	5
				Leary, J.B.	5
				Leggio, M.G.	5
				Marianno, P.	5
				Mesa-Gresa, P.	5
				Miller, L.J.	5
				Munhoz, C.D.	5
				Neisewander, J.L.	5
				Novaes, L.S.	5
				Oostindjer, M.	5
				Pamidi, N.	5
				Pham, T.M.	5
				Pyo, S.	5
				Redolat, R.	5
				Reimert, I.	5
				Rodenburg, T.B.	5
				Sheibani, V.	5
				Sherwin, C.M.	5
				Silveira, R.M.F.	5
				Singhal, G.	5
				Sozda, C.N.	5
				Spandou, E.	5
				Tahamtani, F.M.	5
				Tata, D.A.	5
				Van Dellen, A.	5
				Wu, Y.	5
				Young, R.J.	5
				Zafonte, R.D.	5
				Zhang, X.	5
				Zhang, Z.	5
				de Azevedo, C.S.	5
				Abraham, W.C.	4
				Ando, S.	4
				Avital, A.	4
				Bailey, A.	4
				Balietti, M.	4
				Barbelivien, A.	4
				Barrera, E.D.	4
				Bengoetxea, H.	4
				Blakemore, C.	4
				Bloomsmith, M.A.	4
				Boulouard, M.	4
				Bracke, M.B.M.	4
				Conti, F.	4
				Corbett, D.	4
				Cutuli, D.	4
				Davey, M.J.	4
				Day, J.E.L.	4
				Durán-Carabali, L.E.	4
				Esmaeilpour, K.	4
				Fan, X.	4
				Flórez, J.	4
				Fornaguera, J.	4
				Freret, T.	4
				Fàbrega, E.	4
				Garcia, R.G.	4
				Garner, J.P.	4
				Garrido, P.	4
				Giménez-Llort, L.	4
				Gomez, A.M.	4
				Grippo, A.J.	4
				Undefined	1
COUNTRY		SOURCE/JOURNAL		KEYWORD
United States	596	Applied Animal Behaviour Science	100	Environmental Enrichment	1341
United Kingdom	172	Behavioural Brain Research	94	Article	1199
Brazil	164	Animals	46	Nonhuman	1186
China	116	Plos One	42	Animals	1051
Canada	110	Physiology And Behavior	40	Animal Experiment	999
Spain	105	Neuroscience	37	Controlled Study	959
Australia	98	Brain Research	35	Male	957
Germany	91	Pharmacology Biochemistry And Behavior	35	Animal	778
Italy	87	Zoo Biology	34	Environment	713
France	79	Frontiers In Behavioral Neuroscience	28	Female	593
Netherlands	72	Animal Welfare	26	Priority Journal	564
Japan	52	Scientific Reports	26	Rat	554
Sweden	41	Experimental Neurology	25	Animal Model	493
Mexico	35	European Journal Of Neuroscience	23	Animal Tissue	462
Switzerland	29	Neuroscience Letters	23	Mouse	460
India	26	Journal Of Applied Animal Welfare Science	22	Rats	445
Iran	26	Neurobiology Of Learning And Memory	21	Physiology	411
Argentina	23	Poultry Science	21	Animal Behavior	408
Denmark	23	Psychopharmacology	19	Hippocampus	373
South Korea	21	Brain Research Bulletin	17	Mice	348
Turkey	19	Journal Of Neuroscience	17	Behavior, Animal	325
Poland	18	Journal Of Neurotrauma	17	Animal Housing	297
Belgium	17	Journal Of The American Association For Laboratory Animal Science	17	Animal Welfare	279
Chile	17	Behavioural Processes	16	Housing, Animal	279
New Zealand	17	Laboratory Animals	16	Metabolism	272
Norway	16	Neuropharmacology	16	Cognition	251
Austria	15	Developmental Psychobiology	14	Adult	230
Israel	15	Lab Animal	14	Anxiety	226
Ireland	14	Contemporary Topics In Laboratory Animal Science	13	Nerve Cell Plasticity	223
Greece	13	International Journal Of Developmental Neuroscience	12	Disease Models, Animal	211
Costa Rica	10	Molecular Neurobiology	12	Human	203
Finland	10	Animal	10	Behavior	199
Malaysia	10	Psychoneuroendocrinology	10	Animalia	197
Indonesia	9	British Poultry Science	9	Maze Test	189
Portugal	9	Frontiers In Neuroscience	9	Rats, Sprague-Dawley	184
Hong Kong	8	Hippocampus	9	Memory	177
South Africa	8	Neurobiology Of Aging	9	Protein Expression	175
Czech Republic	7	Animal Cognition	8	Maze Learning	173
Russian Federation	7	Behavioural Pharmacology	8	Animal Cell	169
Pakistan	6	Frontiers In Cellular Neuroscience	8	Learning	165
Singapore	6	Frontiers In Veterinary Science	8	Exploratory Behavior	158
Colombia	4	Journal Of Alzheimer S Disease	8	Mice, Inbred C57BL	157
Taiwan	4	Journal Of Comparative And Physiological Psychology	8	Brain Derived Neurotrophic Factor	156
Croatia	3	Neural Regeneration Research	8	Disease Model	154
Estonia	3	Neurobiology Of Disease	8	Humans	150
Nigeria	3	American Journal Of Primatology	7	Locomotion	148
Puerto Rico	3	Animal Behaviour	7	Brain	143
Romania	3	Animal Technology And Welfare	7	Nervous System Development	140
Slovenia	3	Cerebral Cortex	7	Motor Activity	138
United Arab Emirates	3	Drug And Alcohol Dependence	7	Rats, Wistar	135
Egypt	2	Frontiers In Aging Neuroscience	7	Enriched Environment	134
Hungary	2	Frontiers In Molecular Neuroscience	7	Enrichment	132
Lebanon	2	ILAR Journal	7	Social Behavior	124
Luxembourg	2	Neuropsychopharmacology	7	Pathophysiology	123
Saudi Arabia	2	Aquaculture	6	Gene Expression	119
Slovakia	2	Brain Behavior And Immunity	6	Stress	117
Trinidad and Tobago	2	Developmental Brain Research	6	Immunohistochemistry	115
Algeria	1	Livestock Science	6	Social Environment	115
Bahrain	1	Neuroscience And Biobehavioral Reviews	6	Aging	114
Bangladesh	1	Proceedings Of The National Academy Of Sciences Of The United States Of America	6	Psychology	114
Cyprus	1	Stress	6	Spatial Memory	114
Dominica	1	Addiction Biology	5	Corticosterone	113
Georgia	1	Animal Science Journal	5	Open Field Test	112
Iraq	1	Eneuro	5	Wistar Rat	112
Peru	1	Frontiers In Psychology	5	Neuronal Plasticity	111
Serbia	1	Journal Of Animal Science	5	Cognitive Defect	109
Thailand	1	Journal Of Cerebral Blood Flow And Metabolism	5	Body Weight	108
Uruguay	1	Journal Of Neurochemistry	5	Genetics	107
Venezuela	1	Journal Of Neuroscience Research	5	Sprague Dawley Rat	107
Undefined	17	Journal Of Veterinary Behavior	5	Environmental Factor	103
		Journal Of Zoological And Botanical Gardens	5	Pathology	103
		Molecular Brain Research	5	Review	103
		Molecular Psychiatry	5	Neurogenesis	100
		Neurobiology Of Stress	5	C57BL Mouse	99
		Progress In Neuro Psychopharmacology And Biological Psychiatry	5	Analysis Of Variance	97
		Scandinavian Journal Of Laboratory Animal Science	5	Neurons	97
		Translational Psychiatry	5	Animal Husbandry	94
		Tropical Animal Health And Production	5	Stress, Psychological	92
		Veterinary Clinics Of North America Exotic Animal Practice	5	Task Performance	90
		Aging	4	Dentate Gyrus	89
		Arquivo Brasileiro De Medicina Veterinaria E Zootecnia	4	Spatial Learning	89
		BMJ Open	4	Weaning	89
		Behavioral Neuroscience	4	Newborn	87
		Biological Psychiatry	4	Nerve Cell	86
		Biology	4	Social Interaction	85
		Brain And Behavior	4	Prefrontal Cortex	83
		Brain Structure And Function	4	Social Isolation	83
		Cell Reports	4	Welfare	83
		Comparative Medicine	4	Brain-Derived Neurotrophic Factor	82
		Developmental Neuroscience	4	Exercise	82
		Epilepsy And Behavior	4	Housing	82
		General And Comparative Endocrinology	4	Pregnancy	82
		Hormones And Behavior	4	Elevated Plus Maze Test	81
		International Journal Of Neuroscience	4	Rearing	80
		Journal Of Comparative Neurology	4	Drug Effect	79
		Journal Of Experimental Biology	4	Depression	78
		Journal Of Molecular Neuroscience	4	Mental Stress	78
		Journal Of Neuropathology And Experimental Neurology	4	Time Factors	78
		Journal Of Neurophysiology	4	Animals, Newborn	76
		Learning And Memory	4	Neuroprotection	76
		Neural Plasticity	4	Environmental Exposure	75
		Neuroimage	4	Morris Water Maze Test	74
		Neurorehabilitation And Neural Repair	4	Memory Disorder	73
		Neurotoxicology And Teratology	4	Motor Performance	72
		Restorative Neurology And Neuroscience	4	Cell Proliferation	70
		Science	4	Comparative Study	70
		Acta Neurobiologiae Experimentalis	3	Mice, Transgenic	70
		Annals Of Neurology	3	Sex Difference	70
		Aquaculture Reports	3	Unclassified Drug	70
		Bioscience Journal	3	Aggression	68
		Canadian Journal Of Fisheries And Aquatic Sciences	3	Messenger RNA	68
		Cells	3	Phenotype	68
		Cellular And Molecular Neurobiology	3	Signal Transduction	67
		Cognitive Affective And Behavioral Neuroscience	3	Western Blotting	67
		Environmental Biology Of Fishes	3	Procedures	66
		Experimental And Clinical Psychopharmacology	3	Age	63
		Experimental Animals	3	Pig	63
		Experimental Gerontology	3	Alzheimer Disease	62
		Frontiers In Animal Science	3	Physical Activity	62
		Frontiers In Pharmacology	3	Dopamine	60
		Heliyon	3	Transgenic Mouse	60
		International Journal Of Neuropsychopharmacology	3	Perinatal Period	58
		Journal Of AOAC International	3	Age Factors	57
		Journal Of Fish Biology	3	Drug Effects	56
		Journal Of Medical Primatology	3	Hippocampal CA1 Region	56
		Journal Of Neural Transmission	3	Random Allocation	56
		Journal Of The American Veterinary Medical Association	3	Nucleus Accumbens	55
		Journal Of Veterinary Behavior Clinical Applications And Research	3	Traumatic Brain Injury	55
		Molecular Ecology Resources	3	Brain Cortex	54
		Nature Neuroscience	3	Habituation	54
		Neuroreport	3	Corticosterone Blood Level	53
		Revista Brasileira De Ornitologia	3	Rats, Long-Evans	53
		Synapse	3	Brain Region	52
		Veterinarski Arhiv	3	Cell Count	52
		World Rabbit Science	3	Reward	52
		Acta Neuropathologica Communications	2	Corpus Striatum	50
		Advances In Experimental Medicine And Biology	2	Upregulation	50
		Aims Neuroscience	2	Forced Swim Test	49
		Alcoholism Clinical And Experimental Research	2	Drug Self Administration	48
		Anesthesiology	2	Long Term Potentiation	48
		Animal Bioscience	2	Stereotypy	48
		Animal Production Science	2	Adolescent	47
		Animal Science	2	Self Administration	47
		Annals Of Animal Science	2	Physiological Stress	46
		Archiv Fur Geflugelkunde	2	Behaviour	45
		Arzneimittel Forschung Drug Research	2	Complication	45
		Avian Diseases	2	Oxidative Stress	45
		Basic And Clinical Neuroscience	2	Progeny	45
		Behavior Genetics	2	Working Memory	45
		Behavioral And Neural Biology	2	BDNF	44
		Brain Injury	2	Cocaine	44
		Brain Pathology	2	Conditioning	44
		Brain Research Reviews	2	Enzyme Linked Immunosorbent Assay	43
		Brain Sciences	2	Rattus	43
		Brazilian Journal Of Veterinary Research And Animal Science	2	Alzheimer's Disease	42
		Bulletin Of The Physical Fitness Research Institute	2	Cell Survival	42
		Cerebellum	2	Experimental Animal	42
		Ciencia Rural	2	Learning And Memory	42
		Cochrane Database Of Systematic Reviews	2	Brain Injury	41
		Contemporary Clinical Neuroscience	2	Feeding Behavior	41
